# Supplementary material for: Visceral Obesity Determined by CT As a Predictor of Short-term Postoperative Complications in Ovarian Cancer
Source: Research Square preprint supplement (doi:10.21203/rs.3.rs-1229020/v1), 2022-01-11
Supplement: Supplementary file 1 [file 7cc30dc1ea7ed551e3cd602c.docx]

| Table S1. Intra- and post-operative characteristics | | | | |
| --- | --- | --- | --- | --- |
| Characteristics | BMI(kg/m2) | | | P-value |
| < 25 | 25-30 | ＞30 |
| N = 94 | N = 28 | N = 8 |
| Blood loss volume | 860.6 ± 901.8 | 923.1 ± 1025.9 | 675.0 ± 449.6 | 0.778 |
| Operation time (min) |  |  |  |  |
| < 300 | 56(76.7) | 14(19.2) | 3(4.1) | 0.368* |
| ≥ 300 | 38(66.7) | 14(24.6) | 5(8.8) |
| Surgical approach n(%) |  |  |  |  |
| Open abdomen | 83(72.8) | 25(21.9) | 6(5.3) | 0.589* |
| Laparoscopy to open abdomen | 11(68.8) | 3(18.8) | 2(12.5) |
| Scope of operation n(%) |  |  |  |  |
| Bowel resection | 24(77.4) | 6(19.4) | 1(3.2) | 0.641* |
| Lymph node dissection/biopsy | 47(78.3) | 10(16.7) | 3(5.0) | 0.358* |
| Liver resection | 2(2.1) | 0(0) | 0(0) | 0.520* |
| Diaphragmectomy | 19(82.6) | 4(17.4) | 0(0) | 0.154* |
| Ureteral stent implantation | 13(92.9) | 1(7.1) | 0(0) | 0.098* |
| SCS |  |  |  |  |
| 1（low） | 9(69.2) | 3(23.1) | 1(7.7) | 0.992* |
| 2（intermediate） | 69(71.9) | 21(21.9) | 6(6.3) |
| 3（high） | 16(76.2) | 4(19.0) | 1(4.8) |
| R0/R1 |  |  |  |  |
| R0 | 76(72.4) | 24(22.9) | 5(4.8) | 0.383* |
| R1 | 18(72.0) | 4(16.0) | 3(12.0) |
| CDC |  |  |  |  |
| CDC1 | 14(66.7) | 4(19.0) | 3(14.3) | 0.768* |
| CDC2 | 32(76.2) | 8(19.0) | 2(14.3) |
| CDC3 | 1(50.0) | 1(50.0) | 0(0) |
| CDC4 | 4(57.1) | 2(28.6) | 1(14.3) |
| Complications |  |  |  |  |
| Fever | 21(72.4) | 5(17.2) | 3(10.3) | 0.500* |
| Incision infection or bleeding | 1(100) | 0(0) | 0(0) | 0.722* |
| Abnormal liver function | 14(82.4) | 2(11.8) | 1(5.9) | 0.527* |
| Intestinal obstruction | 0(0) | 2(100) | 0(0) | 0.111* |
| Infection or sepsis | 13(81.3) | 3(18.8) | 0(0) | 0.307* |
| Thromboembolism | 5(83.3) | 1(16.7) | 0(0) | 0.628* |
| Blood transfusion rate | 18(81.8) | 4(18.2) | 0(0) | 0.180* |
| Intestinal fistula | 1(100) | 0(0) | 0(0) | 0.722* |
| Pleural effusion | 7(63.6) | 3(27.3) | 1(9.1) | 0.799* |
| Antibiotic using time | 9 ± 4.7 | 8 ± 3.1 | 7 ± 2.9 | 0.409 |
| Time to chemotherapy | 22 ± 12.7 | 22 ± 7.3 | 19 ± 7.4 | 0.742 |
| ICU admission n(%) | 4(57.1) | 2(28.6) | 1(14.3) | 0.607* |
| Length of hospital stay | 19 ± 7.9 | 16 ± 5.4 | 17 ± 1.8 | 0.720 |

*, Fisher’s exact test.
